# Supplementary material
Source: PubMed Central journal article supplement (PMC7163923)
Supplement: NIHMS1573988-supplement-1.pdf [file NIHMS1573988-supplement-1.pdf]

**Table S1.** Full OLS estimates of self-esteem (n=1,252).

|                                  | (1)   |        | (2) |       | (3)    |       | (4)    |        |                      |
|----------------------------------|-------|--------|-----|-------|--------|-------|--------|--------|----------------------|
| <b>Focal Variables</b>           |       |        |     |       |        |       |        |        |                      |
| Black                            | .138  | (.033) | *** | .180  | (.036) | ***   | .035   | (.053) | .100 (.056)          |
| GSS (scale)                      | -.020 | (.003) | *** | -.014 | (.003) | ***   |        |        |                      |
| Low (reference)                  |       |        |     |       |        |       |        |        |                      |
| Middle                           |       |        |     |       |        | -.165 | (.056) | **     | -.132 (.053) *       |
| High                             |       |        |     |       |        | -.496 | (.062) | ***    | -.323 (.070) ***     |
| <b>Interactions [Black ×...]</b> |       |        |     |       |        |       |        |        |                      |
| GSS (scale)                      | .012  | (.004) | **  | .011  | (.004) | **    |        |        |                      |
| Low (reference)                  |       |        |     |       |        |       |        |        |                      |
| Middle                           |       |        |     |       |        | .059  | (.078) |        | .051 (.076)          |
| High                             |       |        |     |       |        | .246  | (.087) | **     | .179 (.083) *        |
| <b>Covariates</b>                |       |        |     |       |        |       |        |        |                      |
| Age                              |       |        |     | .000  | (.002) |       |        |        | -.001 (.002)         |
| Female                           |       |        |     | .030  | (.037) |       |        |        | .025 (.036)          |
| Childhood financial hardship     |       |        |     | -.029 | (.023) |       |        |        | -.029 (.023)         |
| Parental education               |       |        |     | .000  | (.010) |       |        |        | -.001 (.010)         |
| Major life events                |       |        |     | .008  | (.005) |       |        |        | .008 (.005)          |
| Lifetime psychiatric disorders   |       |        |     | -.093 | (.028) | **    |        |        | -.100 (.028) ***     |
| Married                          |       |        |     | -.021 | (.039) |       |        |        | -.022 (.038)         |
| Education                        |       |        |     | .004  | (.008) |       |        |        | .005 (.008)          |
| Financial resources              |       |        |     | .078  | (.027) | **    |        |        | .075 (.028) **       |
| Employed full-time               |       |        |     | .189  | (.073) | *     |        |        | .214 (.075) **       |
| Employed part-time               |       |        |     | .043  | (.100) |       |        |        | .062 (.099)          |
| Retired                          |       |        |     | .175  | (.089) |       |        |        | .183 (.088) *        |
| Other employment status          |       |        |     | .031  | (.100) |       |        |        | .051 (.102)          |
| Major discrimination             |       |        |     | -.005 | (.016) |       |        |        | -.006 (.016)         |
| Daily discrimination             |       |        |     | -.135 | (.038) | **    |        |        | -.134 (.038) **      |
| Obese                            |       |        |     | -.020 | (.040) |       |        |        | -.009 (.041)         |
| Smoker                           |       |        |     | .085  | (.054) |       |        |        | .062 (.052)          |
| Heavy drinker                    |       |        |     | -.094 | (.055) |       |        |        | -.119 (.055) *       |
| Intercept                        | 4.522 | (.026) | *** | 4.659 | (.202) | ***   | 4.760  | (.029) | *** 4.841 (.211) *** |
| Adjusted R-squared               | .122  |        |     | .198  |        |       | .099   |        | .187                 |

Notes: Unstandardized coefficients are reported with robust standard errors in parentheses. All estimates adjust for post-stratification weighting and clustering at the census block group level. GSS=goal-striving stress. Scaled GSS scores are mean-centered.

\* $p < .05$ , \*\* $p < .01$ , \*\*\* $p < .001$  (two-tailed).

**Table S2.** Full OLS estimates of John Henryism (n=1,252).

|                                  | (1)    |        |     | (2)    |         |     | (3)    |         |     | (4)    |         |     |
|----------------------------------|--------|--------|-----|--------|---------|-----|--------|---------|-----|--------|---------|-----|
| <b>Focal Variables</b>           |        |        |     |        |         |     |        |         |     |        |         |     |
| Black                            | 1.782  | (.315) | *** | 1.209  | (.397)  | **  | .928   | (.672)  |     | .170   | (.821)  |     |
| GSS (scale)                      | -.117  | (.027) | *** | -.097  | (.030)  | **  |        |         |     |        |         |     |
| Low (reference)                  |        |        |     |        |         |     |        |         |     |        |         |     |
| Middle                           |        |        |     |        |         |     | -.597  | (.510)  |     | -.658  | (.566)  |     |
| High                             |        |        |     |        |         |     | -3.036 | (.639)  | *** | -2.654 | (.753)  | **  |
| <b>Interactions [Black ×...]</b> |        |        |     |        |         |     |        |         |     |        |         |     |
| GSS (scale)                      | .091   | (.042) | *   | .093   | (.043)  | *   |        |         |     |        |         |     |
| Low (reference)                  |        |        |     |        |         |     |        |         |     |        |         |     |
| Middle                           |        |        |     |        |         |     | .965   | (1.052) |     | 1.276  | (1.104) |     |
| High                             |        |        |     |        |         |     | 1.507  | (.985)  |     | 1.517  | (1.080) |     |
| <b>Covariates</b>                |        |        |     |        |         |     |        |         |     |        |         |     |
| Age                              |        |        |     | -.013  | (.021)  |     |        |         |     | -.015  | (.021)  |     |
| Female                           |        |        |     | .740   | (.462)  |     |        |         |     | .686   | (.457)  |     |
| Childhood financial hardship     |        |        |     | -.583  | (.231)  | *   |        |         |     | -.579  | (.235)  | *   |
| Parental education               |        |        |     | -.083  | (.091)  |     |        |         |     | -.090  | (.090)  |     |
| Major life events                |        |        |     | .146   | (.046)  | **  |        |         |     | .136   | (.045)  | **  |
| Lifetime psychiatric disorders   |        |        |     | -.902  | (.312)  | **  |        |         |     | -.898  | (.308)  | **  |
| Married                          |        |        |     | .103   | (.544)  |     |        |         |     | .135   | (.527)  |     |
| Education                        |        |        |     | -.070  | (.087)  |     |        |         |     | -.066  | (.085)  |     |
| Financial resources              |        |        |     | .034   | (.348)  |     |        |         |     | -.049  | (.352)  |     |
| Employed full-time               |        |        |     | 1.291  | (.596)  | *   |        |         |     | 1.416  | (.603)  | *   |
| Employed part-time               |        |        |     | .411   | (.878)  |     |        |         |     | .572   | (.863)  |     |
| Retired                          |        |        |     | 1.232  | (1.154) |     |        |         |     | 1.259  | (1.175) |     |
| Other employment status          |        |        |     | -.195  | (1.247) |     |        |         |     | -.071  | (1.178) |     |
| Major discrimination             |        |        |     | .210   | (.224)  |     |        |         |     | .248   | (.227)  |     |
| Daily discrimination             |        |        |     | -.668  | (.373)  |     |        |         |     | -.608  | (.372)  |     |
| Obese                            |        |        |     | -.001  | (.390)  |     |        |         |     | .080   | (.389)  |     |
| Smoker                           |        |        |     | .958   | (.505)  |     |        |         |     | .829   | (.503)  |     |
| Heavy drinker                    |        |        |     | -1.878 | (.835)  | *   |        |         |     | -2.158 | (.824)  | **  |
| Intercept                        | 47.480 | (.215) | *** | 50.330 | (2.041) | *** | 48.770 | (.384)  | *** | 51.438 | (2.172) | *** |
| Adjusted R-squared               | .051   |        |     | .094   |         |     | .054   |         |     | .098   |         |     |

Notes: Unstandardized coefficients are reported with robust standard errors in parentheses. All estimates adjust for post-stratification weighting and clustering at the census block group level. GSS=goal-striving stress. Scaled GSS scores are mean-centered.

\* $p < .05$ , \*\* $p < .01$ , \*\*\* $p < .001$  (two-tailed).

**Table S3.** Full OLS estimates of depressive symptoms (n=1,252).

|                                  | (1)   |        | (2) |       | (3)    |     |       | (4)    |     |       |        |     |
|----------------------------------|-------|--------|-----|-------|--------|-----|-------|--------|-----|-------|--------|-----|
| <b>Focal Variables</b>           |       |        |     |       |        |     |       |        |     |       |        |     |
| Black                            | .035  | (.037) |     | -.007 | (.034) |     | .115  | (.054) | *   | .066  | (.048) |     |
| GSS (scale)                      | .025  | (.002) | *** | .016  | (.002) | *** |       |        |     |       |        |     |
| Low (reference)                  |       |        |     |       |        |     |       |        |     |       |        |     |
| Middle                           |       |        |     |       |        |     | .190  | (.037) | *** | .143  | (.040) | *** |
| High                             |       |        |     |       |        |     | .582  | (.048) | *** | .362  | (.053) | *** |
| <b>Interactions [Black ×...]</b> |       |        |     |       |        |     |       |        |     |       |        |     |
| GSS (scale)                      | -.011 | (.003) | *** | -.010 | (.002) | *** |       |        |     |       |        |     |
| Low (reference)                  |       |        |     |       |        |     |       |        |     |       |        |     |
| Middle                           |       |        |     |       |        |     | -.070 | (.071) |     | -.074 | (.062) |     |
| High                             |       |        |     |       |        |     | -.176 | (.081) | *   | -.135 | (.065) | *   |
| <b>Covariates</b>                |       |        |     |       |        |     |       |        |     |       |        |     |
| Age                              |       |        |     | .001  | (.001) |     |       |        |     | .001  | (.001) |     |
| Female                           |       |        |     | .074  | (.033) | *   |       |        |     | .079  | (.033) | *   |
| Childhood financial hardship     |       |        |     | .008  | (.016) |     |       |        |     | .008  | (.017) |     |
| Parental education               |       |        |     | .014  | (.006) | *   |       |        |     | .015  | (.007) | *   |
| Major life events                |       |        |     | .005  | (.003) |     |       |        |     | .006  | (.003) |     |
| Lifetime psychiatric disorders   |       |        |     | .123  | (.017) | *** |       |        |     | .132  | (.017) | *** |
| Married                          |       |        |     | .006  | (.031) |     |       |        |     | .007  | (.032) |     |
| Education                        |       |        |     | .000  | (.007) |     |       |        |     | -.001 | (.007) |     |
| Financial resources              |       |        |     | -.057 | (.026) | *   |       |        |     | -.055 | (.027) | *   |
| Employed full-time               |       |        |     | -.133 | (.039) | **  |       |        |     | -.165 | (.042) | *** |
| Employed part-time               |       |        |     | -.061 | (.055) |     |       |        |     | -.087 | (.057) |     |
| Retired                          |       |        |     | -.157 | (.063) | *   |       |        |     | -.167 | (.069) | *   |
| Other employment status          |       |        |     | .083  | (.062) |     |       |        |     | .055  | (.066) |     |
| Major discrimination             |       |        |     | .011  | (.014) |     |       |        |     | .012  | (.014) |     |
| Daily discrimination             |       |        |     | .226  | (.032) | *** |       |        |     | .225  | (.032) | *** |
| Obese                            |       |        |     | -.013 | (.028) |     |       |        |     | -.027 | (.029) |     |
| Smoker                           |       |        |     | .015  | (.038) |     |       |        |     | .039  | (.037) |     |
| Heavy drinker                    |       |        |     | .034  | (.046) |     |       |        |     | .066  | (.046) |     |
| Intercept                        | 1.671 | (.019) | *** | 1.012 | (.143) | *** | 1.393 | (.024) | *** | .816  | (.150) | *** |
| Adjusted R-squared               | .245  |        |     | .448  |        |     | .187  |        |     | .428  |        |     |

Notes: Unstandardized coefficients are reported with robust standard errors in parentheses. All estimates adjust for post-stratification weighting and clustering at the census block group level. GSS=goal-striving stress. Scaled GSS scores are mean-centered.

\* $p < .05$ , \*\* $p < .01$ , \*\*\* $p < .001$  (two-tailed).

**Table S4.** Full OLS estimates of anxiety (n=1,252).

|                                   | (1)   |        | (2) |       | (3)    |     | (4)   |        |                     |
|-----------------------------------|-------|--------|-----|-------|--------|-----|-------|--------|---------------------|
| <b>Focal Variables</b>            |       |        |     |       |        |     |       |        |                     |
| Black                             | -.109 | (.050) | *   | -.103 | (.050) | *   | .046  | (.076) | .075 (.075)         |
| GSS (scale)                       | .028  | (.003) | *** | .019  | (.003) | *** |       |        |                     |
| Low (reference)                   |       |        |     |       |        |     |       |        |                     |
| Middle                            |       |        |     |       |        |     | .348  | (.058) | *** .255 (.055) *** |
| High                              |       |        |     |       |        |     | .717  | (.070) | *** .460 (.069) *** |
| <b>Interactions [Black × ...]</b> |       |        |     |       |        |     |       |        |                     |
| GSS (scale)                       | -.014 | (.004) | *** | -.013 | (.003) | *** |       |        |                     |
| Low (reference)                   |       |        |     |       |        |     |       |        |                     |
| Middle                            |       |        |     |       |        |     | -.161 | (.112) | -.195 (.100)        |
| High                              |       |        |     |       |        |     | -.296 | (.139) | * -.288 (.107) **   |
| <b>Covariates</b>                 |       |        |     |       |        |     |       |        |                     |
| Age                               |       |        |     | -.006 | (.002) | *   |       |        | -.005 (.002) *      |
| Female                            |       |        |     | .089  | (.049) |     |       |        | .097 (.048) *       |
| Childhood financial hardship      |       |        |     | .003  | (.025) |     |       |        | .003 (.026)         |
| Parental education                |       |        |     | .016  | (.009) |     |       |        | .017 (.009) *       |
| Major life events                 |       |        |     | .014  | (.005) | **  |       |        | .015 (.005) **      |
| Lifetime psychiatric disorders    |       |        |     | .163  | (.022) | *** |       |        | .174 (.023) ***     |
| Married                           |       |        |     | .055  | (.042) |     |       |        | .059 (.043)         |
| Education                         |       |        |     | .023  | (.009) | **  |       |        | .022 (.008) **      |
| Financial resources               |       |        |     | -.077 | (.035) | *   |       |        | -.069 (.034) *      |
| Employed full-time                |       |        |     | -.066 | (.058) |     |       |        | -.108 (.061)        |
| Employed part-time                |       |        |     | -.094 | (.089) |     |       |        | -.119 (.086)        |
| Retired                           |       |        |     | -.158 | (.096) |     |       |        | -.170 (.097)        |
| Other employment status           |       |        |     | .190  | (.107) |     |       |        | .164 (.112)         |
| Major discrimination              |       |        |     | -.020 | (.016) |     |       |        | -.018 (.017)        |
| Daily discrimination              |       |        |     | .263  | (.041) | *** |       |        | .263 (.041) ***     |
| Obese                             |       |        |     | -.030 | (.047) |     |       |        | -.044 (.046)        |
| Smoker                            |       |        |     | -.040 | (.058) |     |       |        | -.010 (.059)        |
| Heavy drinker                     |       |        |     | .064  | (.073) |     |       |        | .101 (.081)         |
| Intercept                         | 1.933 | (.025) | *** | .997  | (.217) | *** | 1.548 | (.040) | *** .702 (.220) **  |
| Adjusted R-squared                | .156  |        |     | .334  |        |     | .130  |        | .322                |

Notes: Unstandardized coefficients are reported with robust standard errors in parentheses. All estimates adjust for post-stratification weighting and clustering at the census block group level. GSS=goal-striving stress. Scaled GSS scores are mean-centered.

\* $p < .05$ , \*\* $p < .01$ , \*\*\* $p < .001$  (two-tailed).

**Table S5.** Full OLS estimates of 12-hour urinary cortisol (n=1,252).

|                                   | (1)              | (2)              | (3)              | (4)              |
|-----------------------------------|------------------|------------------|------------------|------------------|
| <b>Focal Variables</b>            |                  |                  |                  |                  |
| Black                             | .110 (.054) *    | .159 (.076) *    | -.136 (.096)     | -.085 (.141)     |
| GSS (scale)                       | -.003 (.003)     | -.002 (.004)     |                  |                  |
| Low (reference)                   |                  |                  |                  |                  |
| Middle                            |                  |                  | .011 (.087)      | -.014 (.085)     |
| High                              |                  |                  | -.004 (.079)     | .027 (.093)      |
| <b>Interactions [Black x...]</b>  |                  |                  |                  |                  |
| GSS (scale)                       | .016 (.004) ***  | .013 (.004) **   |                  |                  |
| Low (reference)                   |                  |                  |                  |                  |
| Middle                            |                  |                  | .231 (.151)      | .256 (.164)      |
| High                              |                  |                  | .406 (.117) **   | .379 (.129) **   |
| <b>Covariates</b>                 |                  |                  |                  |                  |
| Age                               |                  | -.006 (.003)     |                  | -.006 (.004)     |
| Female                            |                  | -.207 (.056) *** |                  | -.213 (.057) *** |
| Childhood financial hardship      |                  | -.047 (.034)     |                  | -.044 (.034)     |
| Parental education                |                  | -.017 (.015)     |                  | -.017 (.015)     |
| Major life events                 |                  | .001 (.007)      |                  | .001 (.007)      |
| Lifetime psychiatric disorders    |                  | -.068 (.034) *   |                  | -.074 (.034) *   |
| Married                           |                  | .008 (.069)      |                  | .008 (.069)      |
| Education                         |                  | -.010 (.011)     |                  | -.011 (.011)     |
| Financial resources               |                  | .026 (.046)      |                  | .033 (.048)      |
| Employed full-time                |                  | .141 (.089)      |                  | .135 (.089)      |
| Employed part-time                |                  | .206 (.120)      |                  | .199 (.121)      |
| Retired                           |                  | .215 (.178)      |                  | .211 (.171)      |
| Other employment status           |                  | .086 (.159)      |                  | .085 (.159)      |
| Major discrimination              |                  | .006 (.026)      |                  | .008 (.025)      |
| Daily discrimination              |                  | .070 (.053)      |                  | .070 (.054)      |
| Obese                             |                  | -.038 (.060)     |                  | -.046 (.060)     |
| Smoker                            |                  | -.059 (.081)     |                  | -.061 (.080)     |
| Heavy drinker                     |                  | -.112 (.113)     |                  | -.120 (.114)     |
| 12-hour urine collection end time |                  | .000 (.000) ***  |                  | .000 (.000) ***  |
| Takes blood pressure medications  |                  | -.308 (.074) *** |                  | -.313 (.074) *** |
| Did not fast before collection    |                  | -.174 (.182)     |                  | -.114 (.191)     |
| Intercept                         | 1.993 (.034) *** | 1.916 (.307) *** | 1.992 (.057) *** | 1.924 (.304) *** |
| Adjusted R-squared                | .011             | .096             | .009             | .097             |

Notes: Unstandardized coefficients are reported with robust standard errors in parentheses. All estimates adjust for post-stratification weighting and clustering at the census block group level. GSS=goal-striving stress. Scaled GSS scores are mean-centered. Cortisol is in logged ug/L.

\* $p < .05$ , \*\* $p < .01$ , \*\*\* $p < .001$  (two-tailed).

**Table S6.** Full OLS estimates of DHEAS (n=1,252).

|                                  | (1)              | (2)              | (3)              | (4)              |
|----------------------------------|------------------|------------------|------------------|------------------|
| <b>Focal Variables</b>           |                  |                  |                  |                  |
| Black                            | -.162 (.052) **  | -.170 (.044) *** | .008 (.090)      | -.021 (.069)     |
| GSS (scale)                      | .001 (.003)      | .000 (.002)      |                  |                  |
| Low (reference)                  |                  |                  |                  |                  |
| Middle                           |                  |                  | .225 (.084) **   | .028 (.066)      |
| High                             |                  |                  | .113 (.092)      | -.024 (.076)     |
| <b>Interactions [Black x...]</b> |                  |                  |                  |                  |
| GSS (scale)                      | .000 (.004)      | -.002 (.003)     |                  |                  |
| Low (reference)                  |                  |                  |                  |                  |
| Middle                           |                  |                  | -.254 (.130)     | -.197 (.097) *   |
| High                             |                  |                  | -.197 (.150)     | -.179 (.089) *   |
| <b>Covariates</b>                |                  |                  |                  |                  |
| Age                              |                  | -.027 (.002) *** |                  | -.027 (.002) *** |
| Female                           |                  | -.530 (.044) *** |                  | -.526 (.044) *** |
| Childhood financial hardship     |                  | -.021 (.027)     |                  | -.022 (.027)     |
| Parental education               |                  | .002 (.010)      |                  | .002 (.010)      |
| Major life events                |                  | -.004 (.004)     |                  | -.004 (.004)     |
| Lifetime psychiatric disorders   |                  | .007 (.023)      |                  | .010 (.023)      |
| Married                          |                  | -.015 (.047)     |                  | -.015 (.046)     |
| Education                        |                  | -.008 (.011)     |                  | -.008 (.011)     |
| Financial resources              |                  | .000 (.034)      |                  | -.003 (.034)     |
| Employed full-time               |                  | .164 (.072) *    |                  | .162 (.071) *    |
| Employed part-time               |                  | .189 (.092) *    |                  | .192 (.092) *    |
| Retired                          |                  | -.140 (.128)     |                  | -.145 (.128)     |
| Other employment status          |                  | .041 (.124)      |                  | .042 (.125)      |
| Major discrimination             |                  | -.019 (.017)     |                  | -.019 (.017)     |
| Daily discrimination             |                  | .011 (.040)      |                  | .014 (.040)      |
| Obese                            |                  | .099 (.043) *    |                  | .102 (.043) *    |
| Smoker                           |                  | .089 (.053)      |                  | .088 (.053)      |
| Heavy drinker                    |                  | .176 (.073) *    |                  | .181 (.072) *    |
| Collection time                  |                  | .000 (.000)      |                  | .000 (.000) *    |
| Takes blood pressure medications |                  | -.048 (.049)     |                  | -.047 (.049)     |
| Did not fast before collection   |                  | .073 (.138)      |                  | .052 (.136)      |
| Intercept                        | 4.788 (.033) *** | 6.083 (.270) *** | 4.663 (.064) *** | 6.064 (.292) *** |
| Adjusted R-squared               | .007             | .403             | .018             | .405             |

Notes: Unstandardized coefficients are reported with robust standard errors in parentheses. All estimates adjust for post-stratification weighting and clustering at the census block group level. GSS=goal-striving stress. Scaled GSS scores are mean-centered. DHEAS is in logged ug/dL.

\* $p < .05$ , \*\* $p < .01$ , \*\*\* $p < .001$  (two-tailed).

Table S7. Full OLS estimates of cortisol:DHEAS ratio (n=1,252).

|                                   | (1)    |        | (2) |        | (3)    |       | (4)    |        |       |        |        |     |
|-----------------------------------|--------|--------|-----|--------|--------|-------|--------|--------|-------|--------|--------|-----|
| <b>Focal Variables</b>            |        |        |     |        |        |       |        |        |       |        |        |     |
| Black                             | .271   | (.065) | *** | .332   | (.077) | ***   | -.140  | (.146) | -.051 | (.150) |        |     |
| GSS (scale)                       | -.004  | (.005) |     | -.001  | (.004) |       |        |        |       |        |        |     |
| Low (reference)                   |        |        |     |        |        |       |        |        |       |        |        |     |
| Middle                            |        |        |     |        |        | -.214 | (.125) |        | -.036 | (.112) |        |     |
| High                              |        |        |     |        |        | -.117 | (.125) |        | .052  | (.123) |        |     |
| <b>Interactions [Black x...]</b>  |        |        |     |        |        |       |        |        |       |        |        |     |
| GSS (scale)                       | .016   | (.005) | **  | .015   | (.005) | **    |        |        |       |        |        |     |
| Low (reference)                   |        |        |     |        |        |       |        |        |       |        |        |     |
| Middle                            |        |        |     |        |        | .478  | (.171) | **     | .434  | (.167) | *      |     |
| High                              |        |        |     |        |        | .596  | (.205) | **     | .552  | (.171) | **     |     |
| <b>Covariates</b>                 |        |        |     |        |        |       |        |        |       |        |        |     |
| Age                               |        |        |     | .021   | (.004) | ***   |        |        | .022  | (.004) | ***    |     |
| Female                            |        |        |     | .321   | (.070) | ***   |        |        | .311  | (.071) | ***    |     |
| Childhood financial hardship      |        |        |     | -.028  | (.039) |       |        |        | -.025 | (.040) |        |     |
| Parental education                |        |        |     | -.018  | (.017) |       |        |        | -.019 | (.017) |        |     |
| Major life events                 |        |        |     | .005   | (.008) |       |        |        | .004  | (.008) |        |     |
| Lifetime psychiatric disorders    |        |        |     | -.076  | (.041) |       |        |        | -.086 | (.041) | *      |     |
| Married                           |        |        |     | .019   | (.079) |       |        |        | .018  | (.079) |        |     |
| Education                         |        |        |     | -.004  | (.014) |       |        |        | -.004 | (.014) |        |     |
| Financial resources               |        |        |     | .030   | (.055) |       |        |        | .039  | (.058) |        |     |
| Employed full-time                |        |        |     | -.012  | (.113) |       |        |        | -.017 | (.112) |        |     |
| Employed part-time                |        |        |     | .023   | (.155) |       |        |        | .012  | (.154) |        |     |
| Retired                           |        |        |     | .362   | (.244) |       |        |        | .362  | (.236) |        |     |
| Other employment status           |        |        |     | .034   | (.157) |       |        |        | .032  | (.156) |        |     |
| Major discrimination              |        |        |     | .023   | (.032) |       |        |        | .025  | (.031) |        |     |
| Daily discrimination              |        |        |     | .062   | (.064) |       |        |        | .058  | (.064) |        |     |
| Obese                             |        |        |     | -.142  | (.072) |       |        |        | -.152 | (.072) | *      |     |
| Smoker                            |        |        |     | -.151  | (.095) |       |        |        | -.151 | (.093) |        |     |
| Heavy drinker                     |        |        |     | -.290  | (.128) | *     |        |        | -.302 | (.129) | *      |     |
| 12-hour urine collection end time |        |        |     | .000   | (.000) | ***   |        |        | .000  | (.000) | ***    |     |
| Takes blood pressure medications  |        |        |     | -.265  | (.085) | **    |        |        | -.271 | (.085) | **     |     |
| Did not fast before collection    |        |        |     | -.293  | (.183) |       |        |        | -.215 | (.192) |        |     |
| Intercept                         | -2.795 | (.043) | *** | -4.254 | (.376) | ***   | -2.671 | (.087) | ***   | -4.232 | (.395) | *** |
| Adjusted R-squared                | .018   |        |     | .154   |        |       | .024   |        | .160  |        |        |     |

Notes: Unstandardized coefficients are reported with robust standard errors in parentheses. All estimates adjust for post-stratification weighting and clustering at the census block group level. GSS=goal-striving stress. Scaled GSS scores are mean-centered. Cortisol:DHEAS ratio is in natural logarithmic form.

\* $p < .05$ , \*\* $p < .01$ , \*\*\* $p < .001$  (two-tailed).

**Table S8.** Full OLS estimates of systolic blood pressure (n=1,252).

|                                  | (1)            | (2)                 | (3)                 | (4)                 |
|----------------------------------|----------------|---------------------|---------------------|---------------------|
| <b>Focal Variables</b>           |                |                     |                     |                     |
| Black                            | 5.960 (1.301)  | 3.234 (1.098) **    | 4.605 (2.319) *     | .138 (2.029)        |
| GSS (scale)                      | .081 (.053)    | .041 (.056)         |                     |                     |
| Low (reference)                  |                |                     |                     |                     |
| Middle                           |                |                     | -3.082 (1.595)      | -1.854 (1.398)      |
| High                             |                |                     | .142 (1.681)        | -.509 (1.587)       |
| <b>Interactions [Black ×...]</b> |                |                     |                     |                     |
| GSS (scale)                      | -.125 (.075)   | -.024 (.073)        |                     |                     |
| Low (reference)                  |                |                     |                     |                     |
| Middle                           |                |                     | 2.393 (2.279)       | 3.540 (2.233)       |
| High                             |                |                     | 1.121 (2.431)       | 4.254 (2.428) †     |
| <b>Covariates</b>                |                |                     |                     |                     |
| Age                              |                | .232 (.046) ***     |                     | .230 (.046) ***     |
| Female                           |                | -4.206 (1.014) ***  |                     | -4.298 (1.027) ***  |
| Childhood financial hardship     |                | -.695 (.553)        |                     | -.719 (.554)        |
| Parental education               |                | -.255 (.184)        |                     | -.271 (.184)        |
| Major life events                |                | .030 (.102)         |                     | .037 (.102)         |
| Lifetime psychiatric disorders   |                | -.620 (.495)        |                     | -.585 (.484)        |
| Married                          |                | 1.304 (1.086)       |                     | 1.257 (1.078)       |
| Education                        |                | -.345 (.166) *      |                     | -.349 (.172) *      |
| Financial resources              |                | -.975 (.811)        |                     | -1.143 (.842)       |
| Employed full-time               |                | -.148 (1.646)       |                     | -.082 (1.655)       |
| Employed part-time               |                | .476 (1.974)        |                     | .325 (1.964)        |
| Retired                          |                | 1.955 (2.736)       |                     | 2.068 (2.699)       |
| Other employment status          |                | -2.808 (2.546)      |                     | -3.041 (2.528)      |
| Major discrimination             |                | -.085 (.370)        |                     | -.129 (.362)        |
| Daily discrimination             |                | .416 (.981)         |                     | .332 (.997)         |
| Obese                            |                | 5.517 (1.038) ***   |                     | 5.433 (1.048) ***   |
| Smoker                           |                | .726 (1.211)        |                     | .746 (1.216)        |
| Heavy drinker                    |                | 3.056 (1.891)       |                     | 3.146 (1.850)       |
| Takes blood pressure medications |                | 4.950 (1.251) ***   |                     | 4.929 (1.244) ***   |
| Did not fast before collection   |                | -4.047 (3.527)      |                     | -3.761 (3.390)      |
| Intercept                        | 119.865 (.660) | 115.534 (4.635) *** | 120.965 (1.265) *** | 116.950 (4.774) *** |
| Adjusted R-squared               | .038           | .234                | .044                | .237                |

Notes: Unstandardized coefficients are reported with robust standard errors in parentheses. All estimates adjust for post-stratification weighting and clustering at the census block group level. GSS=goal-striving stress. Scaled GSS scores are mean-centered.

† $p < .10$ , \* $p < .05$ , \*\* $p < .01$ , \*\*\* $p < .001$  (two-tailed).



**Table S9.** Full OLS estimates of diastolic blood pressure (n=1,252).

|                                   | (1)    |        | (2) |        | (3)     |       | (4)     |         |            |
|-----------------------------------|--------|--------|-----|--------|---------|-------|---------|---------|------------|
| <b>Focal Variables</b>            |        |        |     |        |         |       |         |         |            |
| Black                             | 3.686  | (.746) | *** | 2.020  | (.835)  | *     | 2.440   | (1.076) | *          |
| GSS (scale)                       | .055   | (.038) |     | .018   | (.039)  |       |         |         |            |
| Low (reference)                   |        |        |     |        |         |       |         |         |            |
| Middle                            |        |        |     |        |         | .262  | (1.030) | .213    | (.993)     |
| High                              |        |        |     |        |         | 1.181 | (.960)  | .069    | (1.022)    |
| <b>Interactions [Black × ...]</b> |        |        |     |        |         |       |         |         |            |
| GSS (scale)                       | -.002  | (.059) |     | .035   | (.054)  |       |         |         |            |
| Low (reference)                   |        |        |     |        |         |       |         |         |            |
| Middle                            |        |        |     |        |         | 1.260 | (1.583) | 1.953   | (1.601)    |
| High                              |        |        |     |        |         | 1.838 | (1.477) | 3.145   | (1.521) *  |
| <b>Covariates</b>                 |        |        |     |        |         |       |         |         |            |
| Age                               |        |        |     | .005   | (.030)  |       |         | .009    | (.031)     |
| Female                            |        |        |     | -4.215 | (.612)  | ***   |         | -4.283  | (.616) *** |
| Childhood financial hardship      |        |        |     | -.380  | (.350)  |       |         | -.388   | (.351)     |
| Parental education                |        |        |     | -.131  | (.115)  |       |         | -.136   | (.115)     |
| Major life events                 |        |        |     | -.056  | (.071)  |       |         | -.056   | (.071)     |
| Lifetime psychiatric disorders    |        |        |     | -.055  | (.366)  |       |         | -.022   | (.362)     |
| Married                           |        |        |     | .623   | (.701)  |       |         | .649    | (.697)     |
| Education                         |        |        |     | -.116  | (.112)  |       |         | -.126   | (.111)     |
| Financial resources               |        |        |     | -.423  | (.541)  |       |         | -.459   | (.571)     |
| Employed full-time                |        |        |     | -.238  | (.879)  |       |         | -.325   | (.870)     |
| Employed part-time                |        |        |     | -.278  | (1.162) |       |         | -.329   | (1.159)    |
| Retired                           |        |        |     | -.898  | (1.710) |       |         | -.814   | (1.706)    |
| Other employment status           |        |        |     | -1.597 | (1.609) |       |         | -1.689  | (1.581)    |
| Major discrimination              |        |        |     | .771   | (.314)  | *     |         | .784    | (.304) *   |
| Daily discrimination              |        |        |     | .590   | (.676)  |       |         | .571    | (.670)     |
| Obese                             |        |        |     | 3.829  | (.633)  | ***   |         | 3.780   | (.628) *** |
| Smoker                            |        |        |     | -.438  | (.807)  |       |         | -.420   | (.799)     |
| Heavy drinker                     |        |        |     | 3.820  | (1.250) | **    |         | 3.808   | (1.229) ** |
| Takes blood pressure medications  |        |        |     | 2.910  | (.848)  | **    |         | 2.895   | (.842) **  |
| Did not fast before collection    |        |        |     | -4.211 | (2.514) |       |         | -3.999  | (2.329)    |
| Intercept                         | 76.522 | (.426) | *** | 78.411 | (3.078) | ***   | 76.002  | (.738)  | ***        |
| Adjusted R-squared                | .036   |        |     | .194   |         |       | .036    |         | .196       |

Notes: Unstandardized coefficients are reported with robust standard errors in parentheses. All estimates adjust for post-stratification weighting and clustering at the census block group level. GSS=goal-striving stress. Scaled GSS scores are mean-centered.

\* $p < .05$ , \*\* $p < .01$ , \*\*\* $p < .001$  (two-tailed).

**Table S10.** Distributional properties of stress hormone variables.

|                        | Mean   | SD     | Min.  | Max.   | Skewness | Kurtosis | Kolmogorov-Smirnov | N     |
|------------------------|--------|--------|-------|--------|----------|----------|--------------------|-------|
| <b>Non-transformed</b> |        |        |       |        |          |          |                    |       |
| Cortisol (ug/L)        | 10.91  | 11.41  | 1.00  | 194.00 | 4.22     | 36.91    | .17 ***            | 1,159 |
| DHEAS (ug/dL)          | 149.18 | 105.47 | 15.00 | 868.00 | 1.71     | 8.01     | .13 ***            | 1,140 |
| Cortisol:DHEAS ratio   | .12    | .18    | .00   | 2.56   | 6.26     | 63.42    | .26 ***            | 1,090 |
| <b>Log-transformed</b> |        |        |       |        |          |          |                    |       |
| Cortisol (ug/L)        | 2.03   | .84    | .00   | 5.27   | .10      | 2.80     | .03                | 1,159 |
| DHEAS (ug/dL)          | 4.76   | .74    | 2.71  | 6.77   | -.37     | 2.76     | .04 *              | 1,140 |
| Cortisol:DHEAS ratio   | -2.71  | 1.04   | -5.85 | .94    | .12      | 3.04     | .03                | 1,090 |

Note: Statistics were derived from non-imputed data.

\* $p < .05$ , \*\*\* $p < .001$ .

**Table S11.** Average marginal predictions of hormone levels by race and GSS grouping (n=1,252).

|                   | Cortisol (ug/L) | DHEAS (ug/dL) | Cortisol:DHEAS ratio |
|-------------------|-----------------|---------------|----------------------|
| White, low GSS    | 7.22            | 120.09        | .06                  |
| White, middle GSS | 7.12            | 123.51        | .06                  |
| White, high GSS   | 7.42            | 117.88        | .06                  |
| Black, low GSS    | 6.63            | 116.58        | .06                  |
| Black, middle GSS | 8.45            | 99.03         | .09                  |
| Black, high GSS   | 9.96            | 95.47         | .10                  |

Notes: Estimates adjust for post-stratification weighting and clustering at the census block group level.

Covariates and biomarker controls are held at their respective means.
